# Supplementary material for: In situ monitoring of TiO2(B)/anatase nanoparticle formation and application in Li-ion and Na-ion batteries
Source: Royal Society of Chemistry journal article supplement (doi:10.1039/c5ta04110d), 2015-01-01
Supplement: c5ta04110d1.pdf [file c5ta04110d1.pdf]

## Supporting Information

for

### ***In situ* monitoring of TiO<sub>2</sub>(B)/anatase nanoparticles formation and application in Li-ion and Na-ion batteries**

M. Søndergaard,<sup>a,b</sup> K. J. Dalgaard,<sup>a</sup> E. D. Bøjesen,<sup>a</sup> K. Wonsyld,<sup>b</sup> S. Dahl,<sup>b</sup> and B. B. Iversen,<sup>a\*</sup>

1. PXRD of sample without NH<sub>4</sub>OH
2. Full PXRD of temperature series
3. Additional TEM pictures
4. Photo of samples
5. TG/DTA measurements
6. IR-spectra of as-prepared samples
7. Additional electrochemical properties of Na-cells

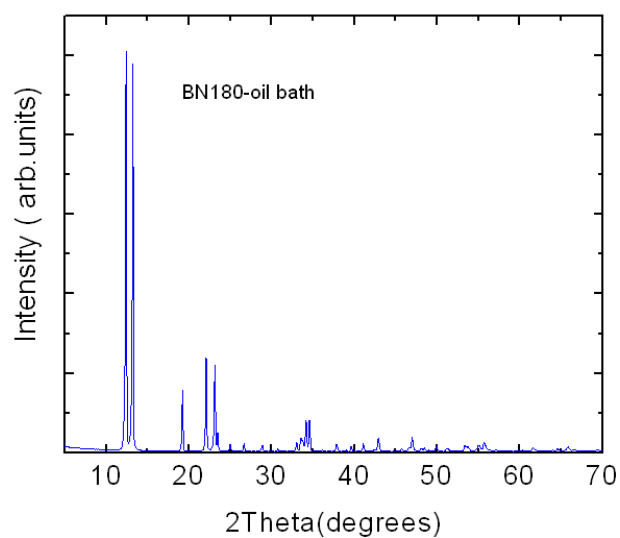

**S.I. 1** PXRD of sample with no addition of  $\text{NH}_4\text{OH}$  – probably large crystallites of a Ti-organic compound.

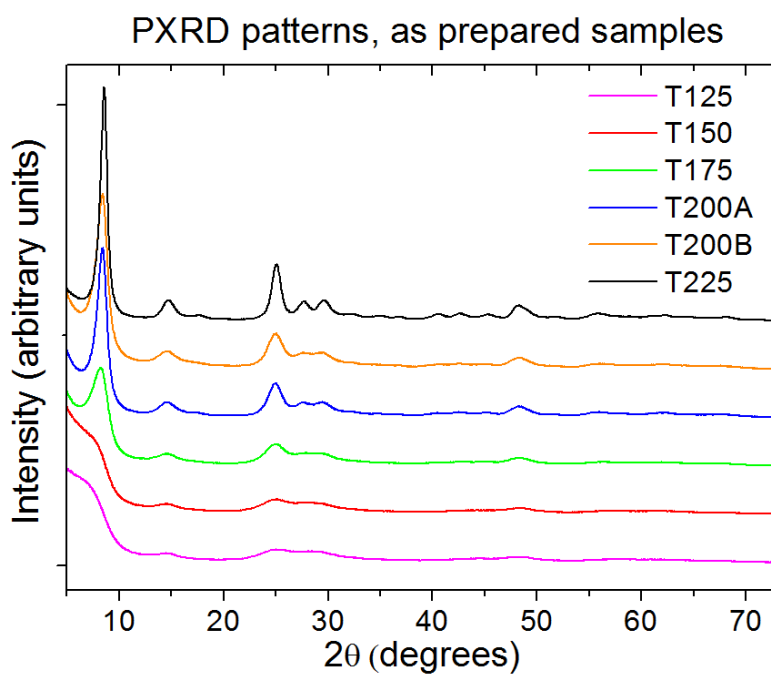

**S.I.2** PXRD of temperature series including low angle reflections

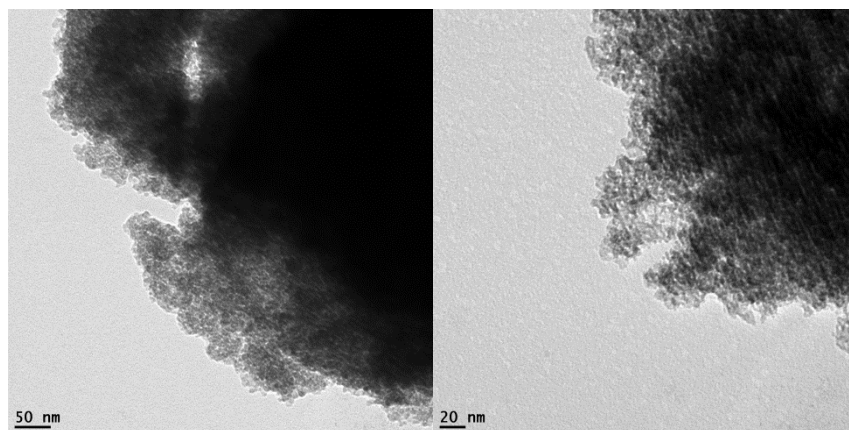

S.I.3. TEM pictures of **Left:** T225-300 and **Right:** T225-350.

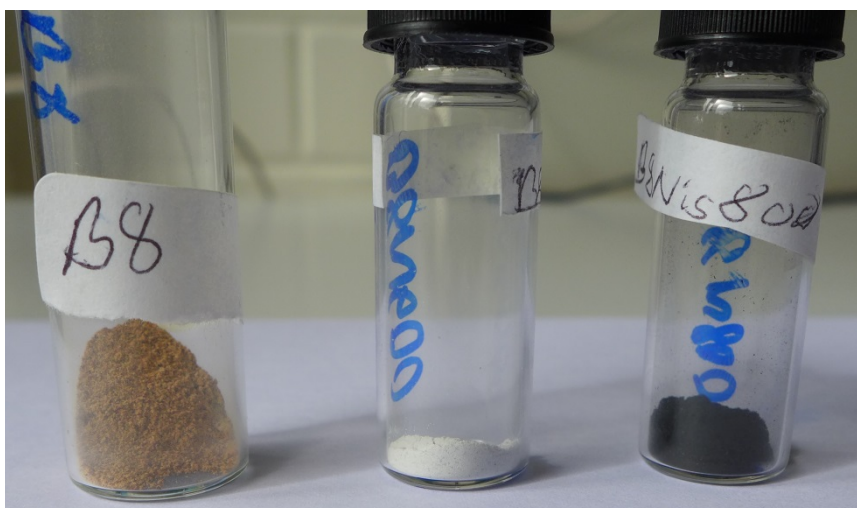

S.I.4. Photos of samples **Left:** as prepared T225 dried at 150°C. **Middle:** The T225 sample heated to 600°C in air. **Right:** the T225 sample with added NaOH heated to 800 °C in oxygen-deficient atmosphere during in situ diffraction.

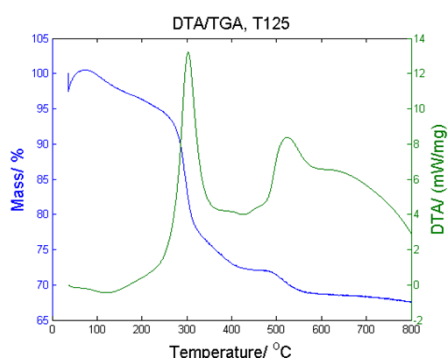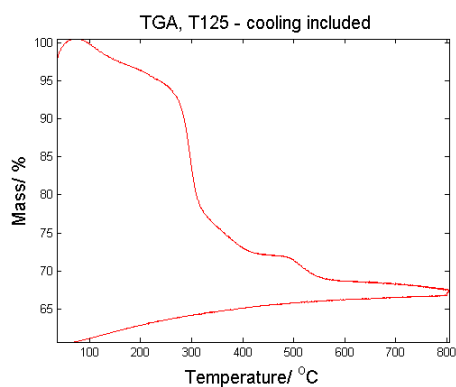

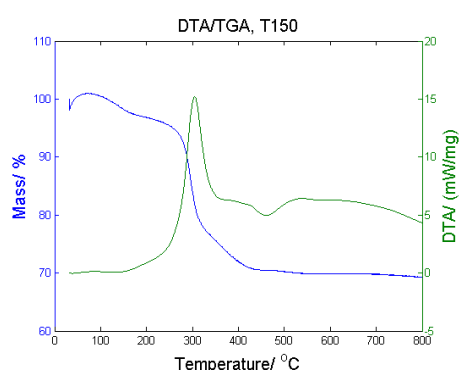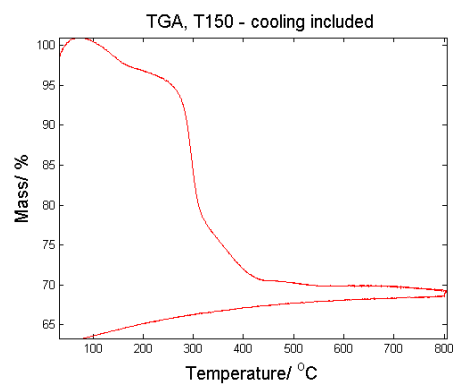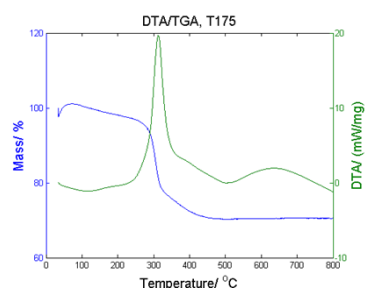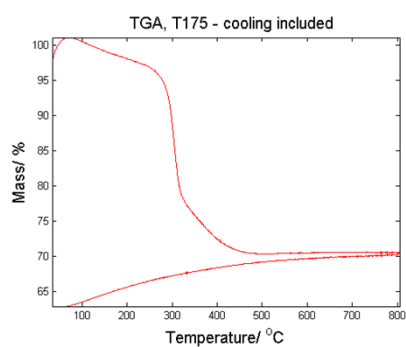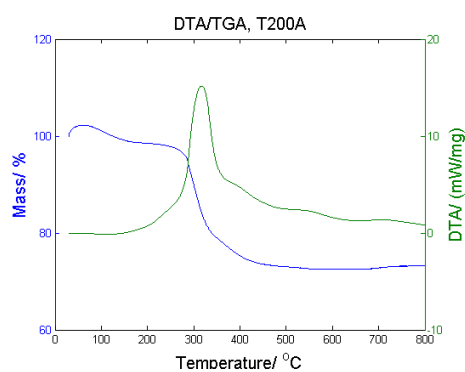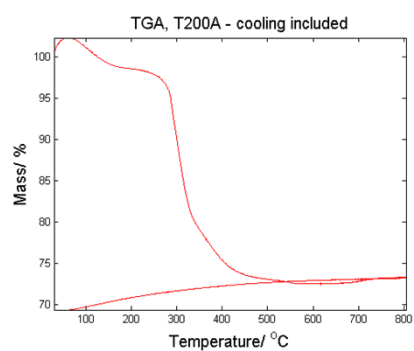

S.I.5. TG/DTA measurements on samples T-125 to T-200.

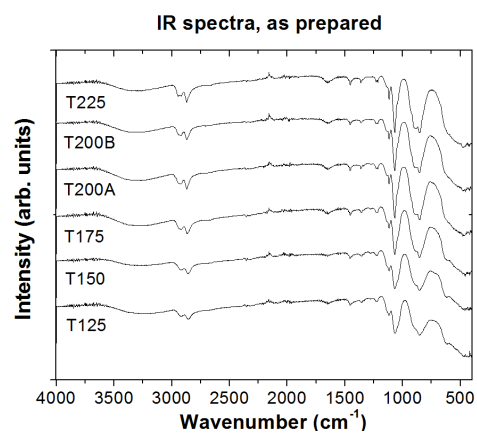

**S.I.6.** IR-spectra of as-prepared samples

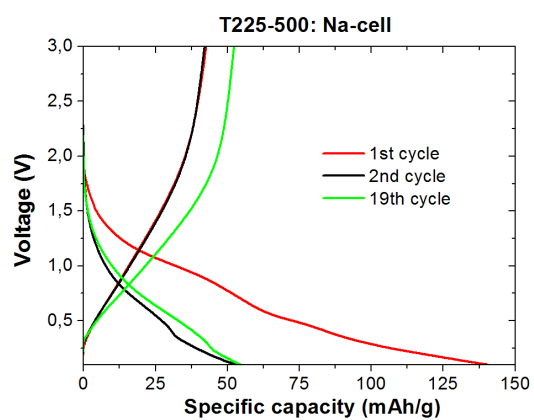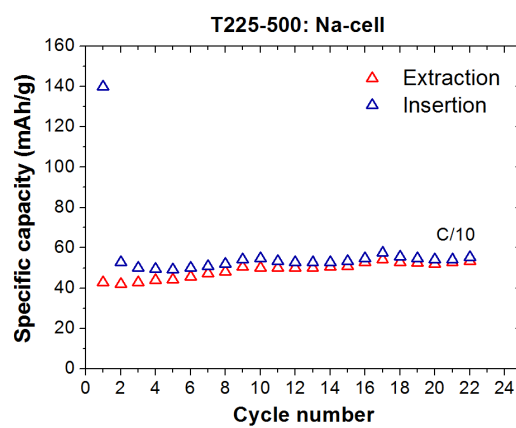

**S.I. 7** Electrochemical performance of Na-cells with the working electrode made from the T225-500 sample.
